# Supplementary material for: Neospora caninum and/or Toxoplasma gondii Seroprevalence: Vaccination against PCV2 and Muscle Enzyme Activity in Seropositive and Seronegative Pigs
Source: MDPI journal article supplement (doi:10.3390/microorganisms9051097), 2021-05-20
Supplement: s1 [file s1]

### Real-time PCR assay

#### Sample selection for PCV2 DNA detection

Out of the 42 samples from the unvaccinated against PCV2 pigs, a number of 17 samples from pigs seropositive to *T. gondii* and/ or *N. caninum* were selected for PCV2 DNA detection by real-time PCR (Table 1).

#### Method

All samples were subjected to nucleic acid extraction, using the QIAamp® cadon® Pathogen Mini Kit (Qiagen, Hilden, Germany), under the manufacturer's recommendations. The extracts were subsequently tested for the presence of PCV2 genome, by applying the TaqMan probe-based real-time PCR method as previously described [57]. This method targets a 144 bp conserved region of the viral ORF1. The pair of primers used was PCV2-PT-rep6(F) and PCV2-PT-rep149(R) with sequences 5'-CAGCAAGAAGAATGGAAG-3' and 5'-TTACCCTCCTCGCCAAC-3', respectively. Reactions were performed on a LightCycler® 2.0 Instrument (Roche Life Science, Vilvoorde, Belgium) and fluorescence data were analyzed using the LightCycler® Software (version 4.1; Roche Life Science).

#### Results

Out of the 5 unvaccinated sows of T+ group, 4 (80%) were PCR positive to PCV2, while 7 (70%) of the 10 unvaccinated sows of N+ group were PCR positive to PCV2. The two animals seropositive to both pathogens were also PCR positive to PCV2 (Table 1).

**Table 1.** Number of seropositive sows against *T. gondii* and/or *N. caninum*, number of porcine circovirus 2 (PCV2) vaccinated and unvaccinated seropositive sows and number of PCV2 PCR positive and negative PCV2 unvaccinated sows.

| Seropositive sows      |    | PCV2 vaccination status in seropositive sows |    | PCV2 PCR in unvaccinated sows |   |
|------------------------|----|----------------------------------------------|----|-------------------------------|---|
|                        |    | +                                            | -  | +                             | - |
| <i>T. gondii</i> (T+)  | 14 | 9                                            | 5  | 4                             | 1 |
| <i>N. caninum</i> (N+) | 11 | 1                                            | 10 | 7                             | 3 |
| Both                   | 2  | 0                                            | 2  | 2                             | 0 |
| Total                  | 27 | 10                                           | 17 | 13                            | 4 |

#### Conclusion

PCV2 circulation is evident in the majority of unvaccinated seropositive to *T. gondii* and/or *N. caninum* pigs.
